# Supplementary material for: Cytotoxicity and Biomineralization Potential of Flavonoids Incorporated into PNVCL Hydrogels
Source: MDPI journal article supplement (doi:10.3390/jfb14030139), 2023-03-02
Supplement: s1 [file s1]

# Supplementary Materials

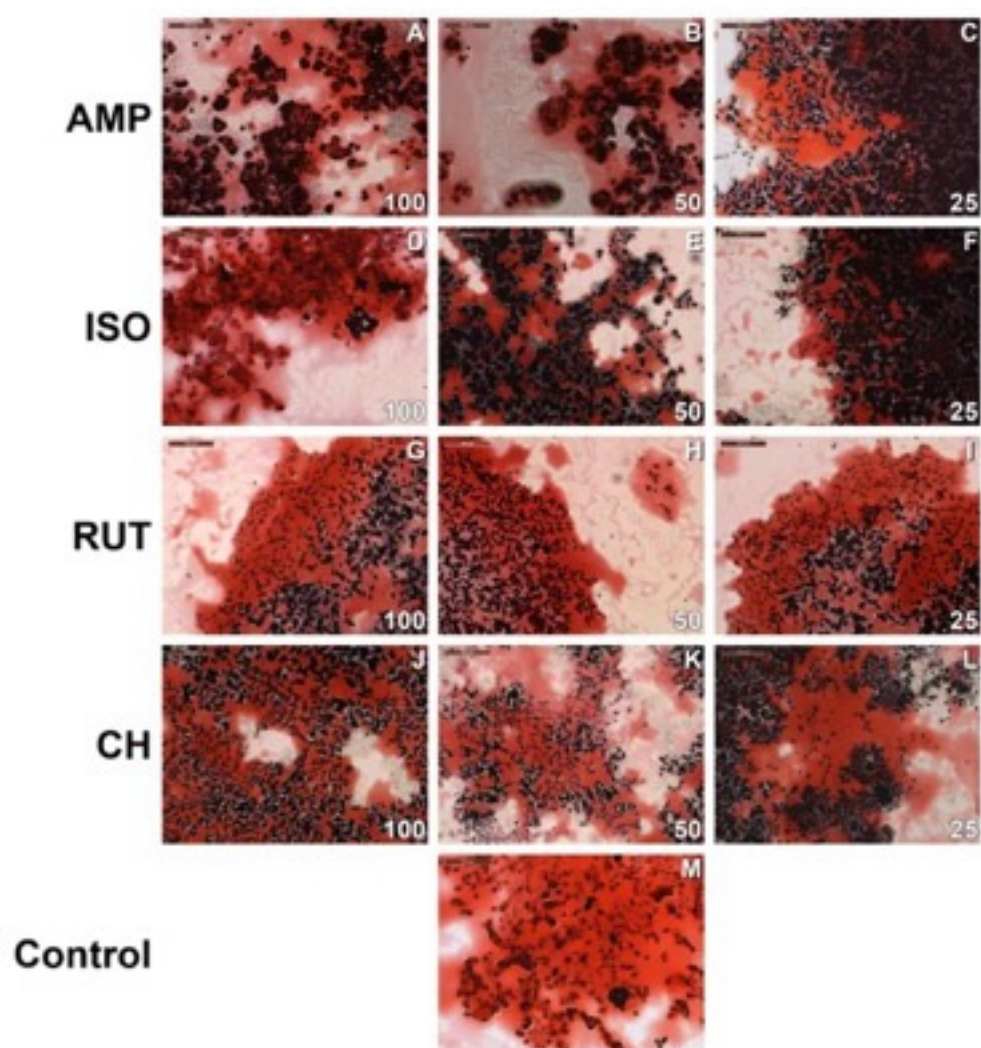

**Figure S1.** Representative images of alizarin red staining obtained by inverted light microscope, indicating the biomineralizing effect of flavonoids on the MDPC-23 cells. All groups induced high nodules deposition, varying according to their concentration. AMP at 10  $\mu$ M (A), AMP at 50  $\mu$ M (B), AMP at 25  $\mu$ M (C), ISO at 100  $\mu$ M (D), ISO at 50  $\mu$ M (E), ISO at 25  $\mu$ M (F), RUT at 100  $\mu$ M (G), RUT at 50  $\mu$ M (H), RUT at 25  $\mu$ M (I) and CH at 100  $\mu$ M (J), CH at 50  $\mu$ M (K), CH at 25  $\mu$ M (L) Control DMEM (M). 4 $\times$  magnification.

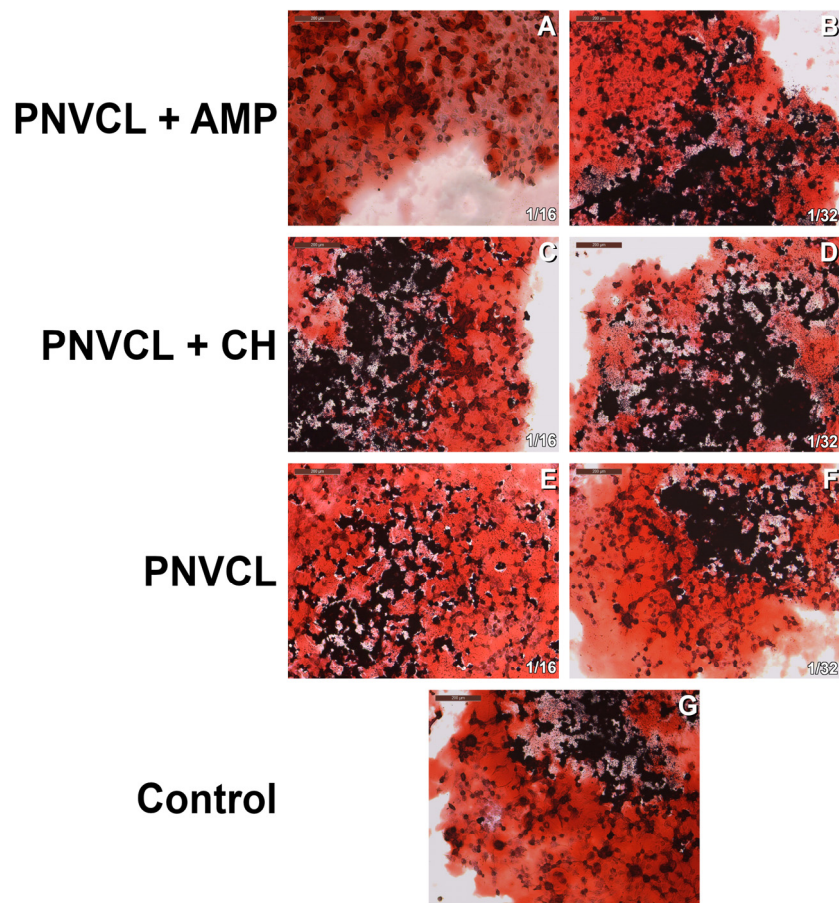

**Figure S2.** Images of alizarin red staining obtained by inverted light microscope, indicating the biomineralizing effect of 48 h hydrogels extracts on the MDPC-23 cells. The greatest nodules deposition can be seen in the groups PNVCL+AMP 1/32 and both dilutions of PNVCL+CH (1/16 and 1/32).PNVCL+AMP 1/16 (A), PNVCL+AMP 1/32 (B), PNVCL+CH 1/16 (C), PNVCL+CH 1/32 (D), PNCVL 1/16 (E), PNVCL 1/32 (F) and control DMEM (G). 4× magnification.

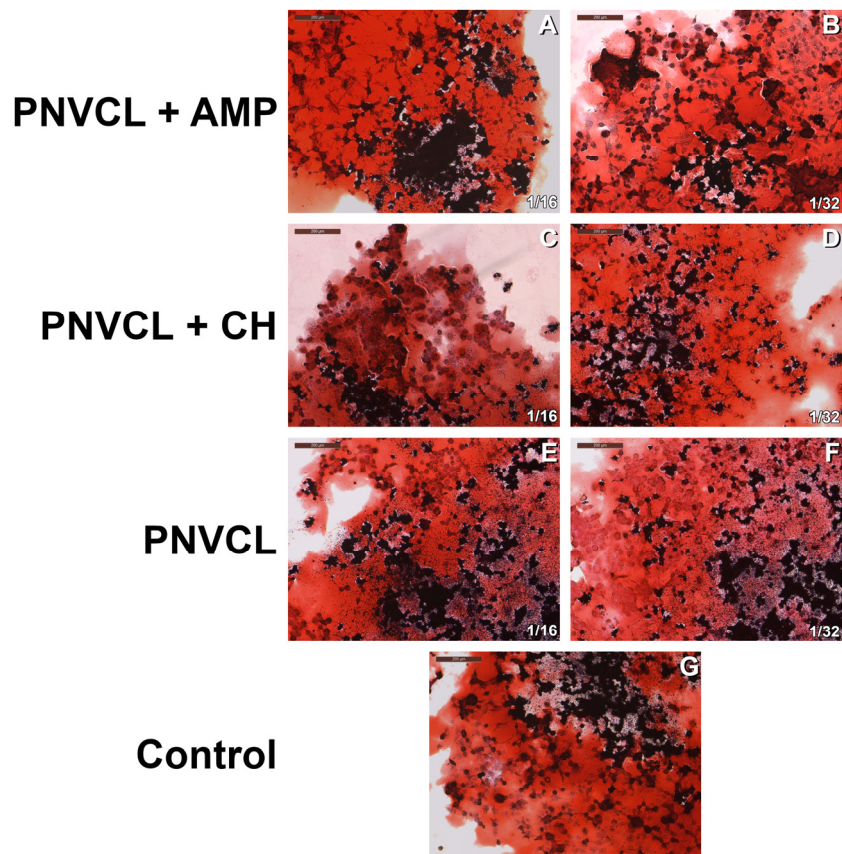

**Figure S3.** Images of alizarin red staining obtained by inverted light microscope, indicating the bioactive effect of 7 days hydrogels extracts on the MDPC-23 cells relative to mineralized nodules formations. The greatest nodules deposition can be seen in the groups PNVCL + AMP and PNVCL + CH , both at 1/16 and 1/32 dilutions. PNVCL+AMP 1/16 (A), PNVCL+AMP 1/32 (B), PNVCL+CH 1/16 (C), PNVCL+CH 1/32 (D), PNCVL 1/16 (E), PNVCL 1/32 (F) and control DMEM (G). 4× magnification.
